# Supplementary material for: Trends in long-term hydrological data from European karst areas: insights for groundwater recharge evaluation
Source: Copernicus journal article supplement (doi:10.5194/egusphere-2024-2078), 2024-07-15
Supplement: Supplementary file [file egusphere-2024-2078-AC3-supplement.pdf]

## **CC1:**

### *General comments*

*Excellent research in karst hydrology that just needs more detail before publication.*

**RESPONSE:** We thank the reviewer for his very positive comment.

*Line 13. Specify the European countries where you have studied the springs in the abstract.*

**RESPONSE:** We will consider this suggestion.

*Lines 25-88. The climate is affected by anthropogenic activities such input of CO<sub>2</sub>. You analyse exclusively the last 20 – 40 years that register other types of climate variations with different driving forces. This scientific point is clarified and discussed exclusively later in the text and not in the introduction. Please, consider to modify the introduction.*

**RESPONSE:** As we mention in the response letter to reviewer 1, we will revise the introduction.

*Line 65. “Rising temperatures and the consequent reduction of snow contribution”.*

*Please, add more recent literature on snowmelt aquifer recharge in karst environments:*

*- Tracking flowpaths in a complex karst system through tracer test and hydrogeochemical monitoring: Implications for groundwater protection (Gran Sasso, Italy). Heliyon, 10(2).*

*- Snowmelt as a determinant factor in the hydrogeological behaviour of high mountain karst aquifers: The Garcés karst system, Central Pyrenees (Spain), Science of the Total Environment, 748, 141363*

**RESPONSE:** We will consider this suggestion and include some more literature after a brief literature review.

*Lines 86-89. Very good that you specify the objectives of your research using bulletin points*

**RESPONSE:** Thank you.

*Line 105. “Storativity” is clear, but not “inertia”. Please, provide explanation for this concept/terminology in karst hydrology.*

**RESPONSE:** Inertia describes the karst system’s resistance to rapid changes in response to external input (e.g. recharge). We will add a short explanation for this term in the main text.

*Line 428. "First period", specify four decades. You cannot recall the attention of the reader only for the for the second period.*

**RESPONSE:** We will add a specification to the first sentence of the conclusion.

*Line 462. Please, integrate recent papers on karst hydrology.*

**RESPONSE: We will consider including more literature as a**

*General comments*

*Figure 1. The map can be much larger.*

**RESPONSE:** We agree and make changes accordingly.

*Figures 2, 4 and 5. Remove the underscore from the legend.*

**RESPONSE:** Thank you for this observation. We will change it.

*Figures 6 and 7. Please, provide more detail on the box plots in the captions. The red line? Median, or arithmetic average?*

**RESPONSE:** The line in the boxplot represents the median (50<sup>th</sup> percentile). We will add this information to the captions of Figure 6 and 7.
